# Supplementary material
Source: ML conference proceedings conference paper supplement (https://openreview.net/forum?id=NQbnPjPYaG6)
Supplement: supplementary_material [file attachment]

## APPENDIX

### A ALGORITHMS AND EXPERIMENT HYPERPARAMETERS

Each algorithm in  $\mathcal{A}$  cited in the ‘Related Work’ section can be defined as  $F(\theta) = \theta - \alpha G(\theta)$  for some continuous  $G : \mathbb{R}^d \rightarrow \mathbb{R}^d$ . We have already seen that simultaneous GD is given by  $G_{GD} = \xi$ . The only examples in this paper are two-player games, for which AGD is given by

$$G_{\text{AGD}} = \begin{pmatrix} \xi_1(\theta_1, \theta_2) \\ \xi_2(\theta_1 - \alpha \xi_1, \theta_2) \end{pmatrix}$$

The other algorithms are given by

$$\begin{aligned} G_{\text{EG}} &= \xi \circ (\text{id} - \alpha \xi) & G_{\text{OMD}} &= 2\xi(\theta_k) - \xi(\theta_{k-1}) \\ G_{\text{SGA}} &= (I + \lambda A^T)\xi & G_{\text{CO}} &= (I + \gamma H^T)\xi \\ G_{\text{CGD}} &= (I + \alpha H_o)^{-1}\xi & G_{\text{LA}} &= (I - \alpha H_o)\xi \\ G_{\text{LOLA}} &= (I - \alpha H_o)\xi - \alpha \text{diag}(H_o^T \nabla L) & G_{\text{SOS}} &= (I - \alpha H_o)\xi - p\alpha \text{diag}(H_o^T \nabla L). \end{aligned}$$

For OMD, the previous iterate can be uniquely recovered as  $\theta_{k-1} = (\text{id} - \alpha \xi)^{-1}(\theta_k)$  using the proximal point algorithm if  $\|H\| \leq L$  and  $\alpha < 1/L$ , giving

$$G_{\text{OMD}} = 2\xi - \xi \circ (\text{id} - \alpha \xi)^{-1}.$$

In all experiments we initialise  $\theta_0$  following a standard normal distribution and use a learning rate  $\alpha = 0.01$ , with  $\gamma = 0.01$  for CO. Learning rates  $\alpha_i$  could be chosen to be different for each player  $i$ , but we set them to be equal throughout this paper for simplicity. Claims regarding the behavior of each algorithm for sufficiently small  $\alpha$  mean that all  $\alpha_i$  should be sufficiently small. The  $\lambda$  parameter for SGA is obtained by the alignment criterion introduced in the original paper,

$$\lambda = \text{sign}(\langle \xi, H^T \xi \rangle \langle A^T \xi, H^T \xi \rangle).$$

Similarly, the  $p$  parameter for SOS is given by a two-part criterion which need not be described here.

Accompanying code for all experiments will be submitted with this paper.

### B PROOF OF PROPOSITION 1

We first prove a lemma and state a standard optimization result.

**Lemma 0.** *Let  $G \in C^1(U, \mathbb{R}^d)$  for an open set  $U$ . If  $G$  is  $L$ -Lipschitz then  $\sup_{\theta \in U} \|\nabla G(\theta)\| \leq L$ .*

The proof is an adaptation of (Panageas & Piliouras, 2017, Lemma 7) for non-convex sets.

*Proof.* Fix any  $\theta \in U$  and  $\epsilon > 0$ . Since  $U$  is open, the ball  $B_r(\theta)$  of radius  $r$  centered at  $\theta$  is contained in  $U$  for some  $r > 0$ . By Taylor expansion, for any unit vector  $\theta'$ ,

$$\|G(\theta + r\theta') - G(\theta)\| \geq r \|\nabla G(\theta)\theta'\| - o(r) \geq r \|\nabla G(\theta)\theta'\| - \epsilon r$$

for  $r$  sufficiently small. Since  $G$  is  $L$ -Lipschitz, we obtain

$$r \|\nabla G(\theta)\theta'\| \leq \|G(\theta + r\theta') - G(\theta)\| + r\epsilon \leq r(L + \epsilon).$$

Since  $\epsilon$  was arbitrary,  $\|\nabla G(\theta)\theta'\| \leq L$  for any unit  $\theta'$ . By definition of the norm, we obtain

$$\|\nabla G(\theta)\| = \sup_{\|\theta'\|=1} \|\nabla G(\theta)\theta'\| \leq L$$

for all  $\theta \in U$  and hence  $\sup_{\theta \in U} \|\nabla G(\theta)\| \leq L$ .  $\square$

**Proposition** ((Lange, 2013, Prop. 12.4.4) and (Absil et al., 2005, Th. 4.1)). *Assume  $f$  has  $L$ -Lipschitz gradient and is either analytic or has isolated critical points. Then for any  $0 < \alpha < 2/L$  and  $\theta_0 \in \mathbb{R}^d$  we have*

$$\lim_k \|\theta_k\| = \infty \quad \text{or} \quad \lim_k \theta_k = \bar{\theta}$$

*for some critical point  $\bar{\theta}$ . If  $f$  moreover has compact sublevel sets then the latter holds,  $\lim_k \theta_k = \bar{\theta}$ .*

We can now prove Proposition 1, which avoids requiring Lipschitz continuity by proving that iterates are contained in the sublevel set given by  $\theta_0$  for appropriate learning rate  $\alpha$ .

**Proposition 1.** *Assume  $f \in C^2$  has compact sublevel sets and is either analytic or has isolated critical points. For any  $\theta_0 \in \mathbb{R}^d$ , define  $U_0 = \{f(\theta) \leq f(\theta_0)\}$  and let  $L < \infty$  be a Lipschitz constant for  $\nabla f$  in  $U_0$ . Then for any  $0 < \alpha < 2/L$  we have  $\lim_k \theta_k = \theta$  for some critical point  $\theta$ .*

*Proof.* Note that  $\nabla f \in C^1$ , so  $f$  has  $L$ -Lipschitz gradient inside any compact set  $U$  for some finite  $L$ , and  $\sup_{\theta \in U} \|\nabla^2 f(\theta)\| \leq L$  by Lemma 0. Now define  $U_\alpha = \{\theta - t\alpha\nabla f(\theta) \mid t \in [0, 1], \theta \in U_0\}$  and the continuous function  $L(\alpha) = \sup_{\theta \in U_\alpha} \|\nabla^2 f(\theta)\|$ . Notice that  $U_0 \subset U_\alpha$  for all  $\alpha$ . We prove that  $\alpha L(\alpha) < 2$  implies  $U_\alpha = U_0$  and in particular,  $L(\alpha) = L(0)$ . By Taylor expansion,

$$f(\theta - t\alpha\nabla f) = f(\theta) - \alpha \|\nabla f(\theta)\|^2 + \frac{t^2\alpha^2}{2} \nabla f(\theta)^T \nabla^2 f(\theta - t'\alpha\nabla f) \nabla f(\theta)$$

for some  $t' \in [0, t] \subset [0, 1]$ . Since  $\theta - t'\alpha\nabla f \in U_\alpha$ , it follows that

$$f(\theta - t\alpha\nabla f) \leq f(\theta) - \alpha \|\nabla f(\theta)\|^2 (1 - \alpha L(\alpha)/2) \leq f(\theta)$$

for all  $\alpha L(\alpha) < 2$ . In particular,  $\theta - t\alpha\nabla f \in U_0$  and hence  $U_\alpha = U_0$ . We conclude that  $\alpha L(\alpha) < 2$  implies  $L(\alpha) = L(0)$ , implying in turn  $\alpha L(0) < 2$ . We now claim the converse, namely that  $\alpha L(0) < 2$  implies  $\alpha L(\alpha) < 2$ . For contradiction, assume otherwise that there exists  $\alpha' L(0) < 2$  with  $\alpha' L(\alpha') \geq 2$ . Since  $\alpha L(\alpha)$  is continuous and  $0L(0) = 0 < 2$ , there exists  $\bar{\alpha} \leq \alpha'$  such that  $\bar{\alpha} L(0) < 2$  and  $\bar{\alpha} L(\bar{\alpha}) = 2$ . This is in contradiction with continuity:

$$2 = \bar{\alpha} L(\bar{\alpha}) = \lim_{\alpha \rightarrow \bar{\alpha}^-} \alpha L(\alpha) = \lim_{\alpha \rightarrow \bar{\alpha}^-} \alpha L(0) = \bar{\alpha} L(0).$$

Finally we conclude that  $U_\alpha = U_0$  for all  $\alpha L(0) < 2$ , and in particular, for all  $\alpha L < 2$ . Finally,  $\theta_k \in U_0$  implies  $\theta_{k+1} \in U_\alpha = U_0$  and hence  $\theta_k \in U_0$  by induction. The result now follows by applying the previous proposition to  $f|_{U_0}$ .  $\square$

## C PROOF OF PROPOSITION 2

**Proposition 2.** *Write  $\lambda(A) = \text{Re}(\text{Spec}(A))$  for real parts of the eigenvalues of a matrix  $A$ . We have the following implications, and none of them are equivalences.*

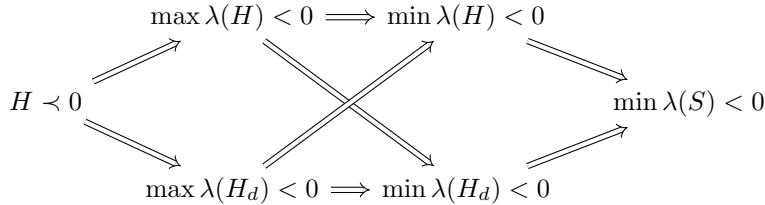

The top row is dynamics-based, governed by the collective Hessian, while the bottom row is game-theoretic whereby  $H_d = \bigoplus \nabla_{ii} L^i$  decomposes into agentwise Hessians. The left and right triangles collide respectively to strict maxima and saddles for single losses, since  $H = S = H_d = \nabla^2 L$ .

*Proof.* First note that  $H \prec 0 \iff S \prec 0 \iff \max \lambda(S) < 0$ , so the leftmost term can be replaced by  $\max \lambda(S) < 0$ .

We begin with the leftmost implications. If  $\max \lambda(S) < 0$  then  $S \prec 0$  by symmetry of  $S$ , implying both  $H \prec 0$  since  $u^T H u = u^T S u$  for all  $u \in \mathbb{R}^d$ , and negative definite diagonal blocks  $\nabla^2 L^i \prec 0$ ; finally  $H_d \prec 0$ . In particular this implies  $\max \lambda(H) < 0$  and  $\max \lambda(H_d) \prec 0$  since real parts of eigenvalues of a negative definite matrix are negative.

The rightmost implications follow as above by contraposition: if  $\min \lambda(S) \geq 0$  then  $S \succeq 0$ , which implies  $H \succeq 0$  and  $H_d \succeq 0$  and hence  $\min \lambda(H) \geq 0$ ,  $\min \lambda(H_d) \geq 0$ .

The top and bottom implications are trivial.

The diagonal implications hold by a trace argument:

$$\sum_i \lambda_i(H) = \text{Tr}(H) = \text{Tr}(H_d) = \sum_i \lambda_i(H_d),$$

hence  $\max \lambda(H) < 0$  implies the LHS is negative and thus  $\sum_i \lambda_i(H_d) < 0$ . It follows that  $\lambda_i(H_d) < 0$  for some  $i$  and finally  $\min \lambda(H_d) < 0$ . The other diagonal holds identically.

We now prove that no implication is an equivalence. For the leftmost implications,

$$H = \begin{pmatrix} -1 & 2 \\ 2 & -1 \end{pmatrix}$$

has  $\max \lambda(H_d) = -1 < 0$  while  $\max \lambda(S) = 3 > 0$ , and

$$H = \begin{pmatrix} 2 & 4 \\ -4 & -4 \end{pmatrix}$$

has  $\max \lambda(H) = -1 < 0$  while  $\max \lambda(S) = 2 > 0$ . This also proves the diagonal implications: the first matrix has  $\min \lambda(H_d) = -1 < 0$  but  $\max \lambda(H) = 3 > 0$ , and the second matrix has  $\min \lambda(H) = -1 < 0$  but  $\max \lambda(H_d) = 2 > 0$ .

For the rightmost implications, swap the sign of the diagonal elements for the two matrices above.

The top and bottom implications are trivially not equivalences:

$$H = H_d = \begin{pmatrix} 1 & 0 \\ 0 & -1 \end{pmatrix}$$

has  $\min \lambda(H) = \min \lambda(H_d) = -1 < 0$  but  $\max \lambda(H) = \max \lambda(H_d) = 1 > 0$ .  $\square$

## D PROOF OF THEOREM 1

The variable changes

$$(x', y') = (y, -x), \quad (x', y') = (-y, x), \quad (x', y') = (-x, -y) \quad (\dagger)$$

will be useful, taking the positive quadrant  $x, y \geq 0$  to the other three.

**Theorem 1.** *There is a coercive, nondegenerate, analytic two-player market  $\mathcal{M}$  whose only critical point is a strict maximum. In particular, algorithms only have four possible outcomes in  $\mathcal{M}$ :*

1. *Iterates are unbounded, and all players diverge to infinite loss. [Not global]*
2. *Iterates are bounded and converge to the strict maximum. [Not reasonable]*
3. *Iterates are bounded and converge to a non-critical point. [Not reasonable]*
4. *Iterates are bounded but do not converge (cycle). [Not global]*

For intuition purposes,  $\mathcal{M}$  was constructed by noticing that there is no necessary reason for the local minima of two coercive losses to coincide: the gradients of each loss may only *simultaneously* vanish at a local maximum in each player's respective coordinate. The highest-order terms (first and last) provide coercivity in both coordinates while still having zero-sum interactions. The  $-x^2$  and  $-y^2$  terms yield a strict local maximum *at* the origin, while the  $\pm xy$  terms provide opposite incentives *around* the origin, preventing any other simultaneous critical point to arise.

*Proof.* Write  $\theta = (x, y)$  and consider the analytic market  $\mathcal{M}$  given by

$$\begin{aligned} L^1 &= x^6/6 - x^2/2 + xy + \frac{1}{4} \left( \frac{y^4}{1+x^2} - \frac{x^4}{1+y^2} \right) \\ L^2 &= y^6/6 - y^2/2 - xy - \frac{1}{4} \left( \frac{y^4}{1+x^2} - \frac{x^4}{1+y^2} \right) \end{aligned}$$

with simultaneous gradient

$$\xi = \begin{pmatrix} x^5 - x + y - \frac{y^4 x}{2(1+x^2)^2} - \frac{x^3}{1+y^2} \\ y^5 - y - x - \frac{x^4 y}{2(1+y^2)^2} - \frac{y^3}{1+x^2} \end{pmatrix}.$$

We prove ‘by hand’ that the origin  $\bar{\theta} = 0$  is the only critical point (solution to  $\xi = 0$ ). See further down for an easier approach based on Sturm’s theorem, computer-assisted though equally rigorous.

We can assume  $x, y \geq 0$  since any other solution can be obtained by a quadrant variable change ( $\dagger$ ). Now assume for contradiction that  $\xi = 0$  with  $y \neq 0$ .

1. We first show that  $y > 1$ . Indeed,

$$0 = \xi_2 = y^5 - y - x - \frac{x^4 y}{2(1+y^2)^2} - \frac{y^3}{1+x^2} < y^5 - y = y(y^4 - 1)$$

implies  $y > 1$  since  $y \geq 0$ .

2. We now show that  $y < 1.5$ . First assume for contradiction that  $x \geq y$ , then

$$\xi_1 = y - x + x^5 - \frac{xy^4}{2(1+x^2)^2} - \frac{x^3}{1+y^2} > 1 - x + x^5 - x^5/8 - x^3/2 := h(x).$$

Now

$$h'(x) = \frac{35}{8}x^4 - \frac{3}{2}x^2 - 1$$

has unique positive root

$$x_0 = \sqrt{\frac{6 + 2\sqrt{79}}{35}}$$

and  $h(x) \rightarrow \infty$  as  $x \rightarrow \infty$ , hence  $h$  attains its minimum at  $x_0$  and plugging  $x_0$  yields a contradiction

$$\xi_1 > h(x_0) > 0.$$

We conclude that  $x < y$ , but combining this with  $x \geq 0$  yields

$$\xi_2 > -2y + y^5 - y^5/8 - y^3 = y(7y^4/8 - y^2 - 2) > 7y^4/8 - y^2 - 2 > 0$$

for all  $y \geq 1.5$ , since the rightmost polynomial is positive at  $y = 1.5$  and has positive derivative

$$7y^3/2 - 2y = y(7y^2/2 - 2) \geq 7(1.5)^2/2 - 2 > 0.$$

We must therefore have  $y < 1.5$  as required.

3. It remains only to show that  $\xi_1 > 0$  for all  $1 < y < 1.5$ . First notice that  $f_x(y) = \xi_1(x, y)$  is concave in  $y$  for any fixed  $x \geq 0$  since

$$f'_x(y) = 1 - \frac{2y^3 x}{(1+x^2)^2} + 2x^3 \frac{y}{(1+y^2)^2}$$

and so

$$f''_x(y) = -\frac{6y^2 x}{(1+x^2)^2} + 2x^3 \frac{1+y^2-4y^2}{(1+y^2)^3} = -\frac{6y^2 x}{(1+x^2)^2} - 2x^3 \frac{3y^2-1}{(1+y^2)^3} \leq 0$$

for  $y > 1$ . It follows that  $f_x$  attains its infimum on the boundary  $y \in \{1, 1.5\}$ , so it suffices to check that  $\xi_1(x, 1) > 0$  and  $\xi_1(x, 1.5) > 0$  for all  $x \geq 0$ . First notice that

$$g(x) := \frac{x}{2(1+x^2)^2}$$

satisfies

$$g'(x) = \frac{1+x^2-4x^2}{2(1+x^2)^2} = \frac{1-3x^2}{2(1+x^2)^2},$$

which has a unique positive root at  $x_0 = 1/\sqrt{3}$ . This critical point of  $g$  must be a maximum since  $g(x) > 0$  for  $x > 0$  and  $g(x) \rightarrow 0$  as  $x \rightarrow \infty$ . It follows that

$$g(x) \leq g(x_0) = \frac{1}{2\sqrt{3}(1+1/3)^2} = 3\sqrt{3}/32.$$

We now obtain

$$\xi_1(x, 1) \geq x^5 - x^3/2 - x + 1 - 3\sqrt{3}/32 := p(x)$$

and

$$\xi_1(x, 1.5) \geq x^5 - 4x^3/13 - x + 1.5 - (1.5)^4 3\sqrt{3}/32 := q(x).$$

Notice that

$$p'(x) = 5x^4 - 3x^2/2 - 1$$

has unique positive root

$$x_0 = \sqrt{\frac{3 + \sqrt{89}}{20}}$$

and  $p(x) \rightarrow \infty$  as  $x \rightarrow \infty$ , hence  $p$  attains its minimum at  $x_0$  and plugging  $x_0$  yields

$$\xi_1(x, 1) \geq p(x_0) > 0.$$

Similarly for  $q$  we have

$$q'(x) = 5x^4 - 12x^2/13 - 1$$

has unique positive root

$$x_0 = \sqrt{\frac{6 + \sqrt{881}}{65}}$$

and plugging  $x_0$  yields

$$\xi_1(x, 1.5) \geq q(x_0) > 0.$$

We conclude that

$$\xi_1(x, y) \geq \min(\xi_1(x, 1), \xi_1(x, 1.5)) > 0$$

and the contradiction is complete, hence  $y = 0$ . Finally  $\xi_2 = 0 = x$ , so  $\bar{\theta} = 0$  is the unique critical point as required. Now the Hessian at  $\bar{\theta}$  is

$$H(\bar{\theta}) = \begin{pmatrix} -1 & 1 \\ -1 & -1 \end{pmatrix},$$

which is negative definite since  $S(\bar{\theta}) = -I \prec 0$ , so  $\bar{\theta}$  is a nondegenerate strict maximum and  $\mathcal{M}$  is nondegenerate. It remains only to prove coercivity of  $\mathcal{M}$ , namely coercivity of  $L^1$  and  $L^2$ . Coercivity of  $L^1$  follows by noticing that the dominant terms are  $x^6/6$  and  $y^4/(1+x^2)$ . Formally, first note that  $\frac{x^4}{1+y^2} \leq x^4$ , hence

$$L^1 \geq x^6/6 - x^4/4 - x^2/2 + xy + \frac{1}{4} \left( \frac{y^4}{1+x^2} \right).$$

Now  $xy \geq -|xy| \geq -(2x^2 + y^2/8)$  by Young's inequality, hence

$$L^1 \geq x^6/6 - x^4/4 - 5x^2/2 - y^2/8 + \frac{1}{4} \left( \frac{y^4}{1+x^2} \right).$$

For any sequence  $\|\theta\| \rightarrow \infty$ , either  $|x| \rightarrow \infty$  or  $|x|$  is bounded above by some  $k \in \mathbb{R}$  and  $|y| \rightarrow \infty$ . In the latter case, we have

$$\lim_{\|\theta\| \rightarrow \infty} L^1 \geq \lim_{|y| \rightarrow \infty} -k^4/4 - 5k^2/2 - y^2/8 + \frac{y^4}{4(1+k^2)} = \infty$$

since the leading term  $y^4$  is of even degree and has positive coefficient, so we are done. Otherwise, for  $|x| \rightarrow \infty$ , we pursue the previous inequality to obtain

$$L^1 \geq x^6/6 - x^4/4 - 5x^2/2 + \frac{y^2}{8} \left( \frac{2y^2}{1+x^2} - 1 \right).$$

Now notice that  $y^2 \geq x^2 \geq 1$  implies

$$L^1 \geq x^6/6 - x^4/4 - 5x^2/2 + \frac{x^2}{8} \left( \frac{x^2 - 1}{1 + x^2} \right) \geq x^6/6 - x^4/4 - 5x^2/2 - x^2/8.$$

On the other hand,  $x^2 \geq y^2$  also implies

$$L^1 \geq x^6/6 - x^4/4 - 5x^2/2 - x^2/8$$

by discarding the first (positive) term in the brackets. Both cases lead to the same inequality and hence, for any sequence with  $|x| \rightarrow \infty$ ,

$$\lim_{\|\theta\| \rightarrow \infty} L^1 \geq \lim_{|x| \rightarrow \infty} x^6/6 - x^4/4 - 5x^2/2 - x^2/8 = \infty$$

since the leading term  $x^6$  has even degree and positive coefficient. Hence  $L^1$  is coercive, and the same argument holds for  $L^2$  by swapping  $x$  and  $y$ . As required we have constructed a coercive, nondegenerate, analytic two-player market  $\mathcal{M}$  whose only critical point is a strict maximum.

In particular, any algorithm either has unbounded iterates with infinite losses or bounded iterates. If they are bounded, they either fail to converge or converge. If they converge, they either converge to a non-critical point or a critical point, which can only be the strict maximum.

[For an alternative proof that  $\bar{\theta} = 0$  is the only critical point, we may take advantage of computer algebra systems to find the exact number of real roots using the resultant matrix and Sturm's theorem. Singular (Decker et al., 2019) is one such free and open-source system for polynomial computations, backed by published computer algebra references. In particular, the `rootsur` library used below is based on the book by Basu et al. (2006). First convert the equations into polynomials:

$$\begin{cases} 2(1+x^2)^2(1+y^2)(x^5-x+y) - y^4x(1+y^2) - 2x^3(1+x^2)^2 = 0 \\ 2(1+y^2)^2(1+x^2)(y^5-y-x) - x^4y(1+x^2) - 2y^3(1+y^2)^2 = 0. \end{cases}$$

We compute the resultant matrix determinant of the system with respect to  $y$ , a univariate polynomial  $P$  in  $x$  whose zeros are guaranteed to contain all solutions in  $x$  of the initial system. We then use the Sturm sequence of  $P$  to find its exact number of real roots. This is implemented with the Singular code below, whose output is 1.

```
LIB "solve.lib"; LIB "rootsur.lib";
ring r = (0,x),(y),dp;
poly p1 = 2*(1+x^2)^2*(1+y^2)*(x^5-x+y)-y^4*x*(1+y^2)-2*x^3*(1+x^2)^2;
poly p2 = 2*(1+y^2)^2*(1+x^2)*(y^5-y-x)-x^4*y*(1+x^2)-2*y^3*(1+y^2)^2;
ideal i = p1,p2;
poly f = det(mp_res_mat(i));
ring s = 0,(x,y),dp; poly f = imap(r, f);
nrroots(f);
```

We know that  $\bar{\theta} = 0$  is a real solution, so  $\bar{\theta}$  must be the unique critical point. □

## E PROOF OF THEOREM 2

**Theorem 2.** *Given a reasonable algorithm with bounded continuous distribution on  $\theta_0$  and a real number  $\epsilon > 0$ , there exists a coercive, nondegenerate, almost-everywhere analytic two-player market  $\mathcal{M}_\sigma$  with a strict minimum and no other critical points, such that  $\theta_k$  either cycles or diverges to infinite losses for both players with probability at least  $1 - \epsilon$ .*

*Proof.* We modify the construction from Theorem 1 by deforming a small region around the maximum to replace it with a minimum. First let  $0 < \sigma < 0.1$  and define

$$f_\sigma(\theta) = \begin{cases} (x^2 + y^2 - \sigma^2)/2 & \text{if } \|\theta\| \geq \sigma \\ (y^2 - 3x^2)(x^2 + y^2 - \sigma^2)/(2\sigma^2) & \text{otherwise,} \end{cases}$$

where  $\theta = (x, y)$  and  $\|\theta\| = \sqrt{x^2 + y^2}$  is the standard  $L2$ -norm. Note that  $f_\sigma$  is continuous since

$$\lim_{\|\theta\| \rightarrow \sigma^+} f_\sigma(\theta) = 0 = \lim_{\|\theta\| \rightarrow \sigma^-} f_\sigma(\theta).$$

Now consider the two-player market  $\mathcal{M}_\sigma$  given by

$$\begin{aligned} L^1 &= x^6/6 - x^2 + f_\sigma + xy + \frac{1}{4} \left( \frac{y^4}{1+x^2} - \frac{x^4}{1+y^2} \right) \\ L^2 &= y^6/6 - f_\sigma - xy - \frac{1}{4} \left( \frac{y^4}{1+x^2} - \frac{x^4}{1+y^2} \right). \end{aligned}$$

The resulting losses are continuous but not differentiable; however, they are analytic (in particular smooth) almost everywhere, namely, for all  $\theta$  not on the circle of radius  $\sigma$ . This is sufficient for the purposes of gradient-based optimization, noting that neural nets also fail to be everywhere-differentiable in the presence of rectified linear units.

We claim that  $\mathcal{M}_\sigma$  has a single critical point at the origin  $\bar{\theta} = 0$ . First note that

$$\xi_{\mathcal{M}_\sigma} = \xi_{\mathcal{M}_0} = \begin{pmatrix} x^5 - x + y - \frac{y^4 x}{2(1+x^2)^2} - \frac{x^3}{1+y^2} \\ y^5 - y - x - \frac{x^4 y}{2(1+y^2)^2} - \frac{y^3}{1+x^2} \end{pmatrix} = \xi_{\mathcal{M}}$$

for all  $\|\theta\| \geq \sigma$ , where  $\mathcal{M}$  is the game from Theorem 1. It was proved there that the only real solution to  $\xi = 0$  is the origin, which does not satisfy  $\|\theta\| \geq \sigma$ . Any critical point must therefore satisfy  $\|\theta\| < \sigma$ , for which

$$\xi = \xi_{\mathcal{M}_\sigma} = \begin{pmatrix} x^5 + x + y - 2x(3x^2 + y^2)/\sigma^2 - \frac{y^4 x}{2(1+x^2)^2} - \frac{x^3}{1+y^2} \\ y^5 + y - x - 2y(y^2 - x^2)/\sigma^2 - \frac{x^4 y}{2(1+y^2)^2} - \frac{y^3}{1+x^2} \end{pmatrix}.$$

First note that  $\bar{\theta} = 0$  is a critical point; we prove that there are no others. The continuous parameter  $\sigma$  prevents us from using a formal verification system, so we must work ‘by hand’. Warning: the proof is a long inelegant string of case-by-case inequalities.

Assume for contradiction that  $\xi = 0$  with  $\theta \neq 0$ . First note that  $\|\theta\| < \sigma$  implies  $|x|, |y| < \sigma$ , and  $x = 0$  or  $y = 0$  implies  $x = y = 0$  using  $\xi_1 = 0$  or  $\xi_2 = 0$  respectively. We can therefore assume  $0 < |x|, |y| < \sigma$ . We can moreover assume that  $x > 0$ , the opposite case following by the quadrant change of variables  $(x', y') = (-x, -y)$ .

**1.** We begin with the case  $\sigma/2 \leq x < \sigma$ . First notice that

$$x + y - 2x(3x^2 + y^2)/\sigma^2 = x(1 - 6x^2/\sigma^2) + y(1 - 2xy/\sigma^2) \leq x(1 - 3/2) + y(1 - y/\sigma)$$

and the rightmost term attains its maximum value for  $y = \sigma/2$ , hence

$$x + y - 2x(3x^2 + y^2)/\sigma^2 \leq -x/2 + \sigma/4 \leq 0.$$

This implies

$$\xi_1 \leq x^5 - \frac{y^4 x}{2(1+x^2)^2} - \frac{x^3}{1+y^2} < x^5 - \frac{x^3}{1+y^2} < x^3 \left( 1 - y^2 - \frac{1}{1+y^2} \right) = \frac{-x^3 y^4}{1+y^2} < 0$$

using  $x^2 + y^2 < 1$ , which is a contradiction to  $\xi = 0$ .

**2.** We proceed with the case  $x < \sigma/2$  and  $|y| \leq \sigma/2$ . First,  $y < 0$  implies the contradiction

$$\xi_2 < y - 2y^3/\sigma^2 - \frac{x^4 y}{2(1+y^2)^2} - \frac{y^3}{1+x^2} < y/2 - y \left( \frac{\sigma^4}{2^5} + \frac{\sigma^2}{2^2} \right) < y \left( \frac{1}{2} - \frac{1}{2^5} - \frac{1}{2^2} \right) < 0,$$

so we can assume  $y > 0$ . In particular we have  $(1 - 2y(y+x)/\sigma^2) > 0$ . If  $y \leq x$ , we also obtain

$$\xi_2 < y^5 + (y-x)(1 - 2y(y+x)/\sigma^2) - \frac{y^3}{1+x^2} < y^3 \left( y^2 - \frac{1}{1+x^2} \right) < \frac{-y^3 x^4}{1+x^2} < 0,$$

so we can assume  $x < y$ . There are again two cases to distinguish. If  $x < \sigma/2 - b\sigma^2$  with  $b = 0.08$ ,

$$x(1 - 6x^2/\sigma^2) + y(1 - 2xy/\sigma^2) > x(1 - 3(1/2 - \sigma b)) + x(1 - (1/2 - \sigma b)) > 4\sigma b x$$

which implies the contradiction

$$\xi_1 > 4\sigma bx - \frac{y^4 x}{2(1+x^2)^2} - \frac{x^3}{1+y^2} > \sigma x \left( 4b - \frac{\sigma^4}{2^5} - \frac{\sigma^2}{2^2} \right) > \sigma x \left( 4b - \frac{1}{2^5} - \frac{1}{2^2} \right) > 0.$$

Finally assume  $x \geq \sigma/2 - b\sigma^2$ . Then we have

$$(y-x)(1-2y(x+y)/\sigma^2) < b\sigma^2(1-4x^2/\sigma^2) < b\sigma^2(1-(1-2\sigma b)^2) = 4\sigma^3 b^2(1-\sigma b) < 4\sigma^3 b^2$$

and obtain

$$\xi_2 < y^5 + 4\sigma^3 b^2 - \frac{y^3}{1+x^2} < \sigma^3 \left( \sigma^2/2^5 + 4b^2 - \frac{(1/2 - \sigma b)^3}{1 + \sigma^2/4} \right).$$

We claim that the rightmost term is negative. Indeed, the quantity inside the brackets has derivative

$$\sigma/2^4 + \frac{(1/2 - \sigma b)^2}{(1 + \sigma^2/4)^2} (3b(1 + \sigma^2/4) + \sigma(1/2 - \sigma b)/2) > 0$$

and so its supremum across  $\sigma \in [0, 0.1]$  must be attained at  $\sigma = 0.1$ . We obtain the contradiction

$$\xi_2 < \sigma^3 \left( 0.01/2^5 + 4b^2 - \frac{(1/2 - b)^3}{1 + 0.01/4} \right) < 0$$

for  $b = 0.08$  and  $\sigma > 0$ , as required.

**3.** Finally, consider the case  $x < \sigma/2$  and  $|y| > \sigma/2$ . First,  $y < 0$  implies the contradiction

$$\xi_1 < x + y - 2x(3x^2 + y^2)/\sigma^2 < -2x(3x^2 + y^2) < 0$$

so we can assume  $y > 0$ . Now assume  $y < \sigma - x(1 + \sigma^2)$ . Then

$$x(1 - 6x^2/\sigma^2) + y(1 - 2xy/\sigma^2) > -x/2 + y(1 - y/\sigma) > -x/2 + x(1 + \sigma^2) > x(1/2 + \sigma^2),$$

which yields the contradiction

$$\xi_1 > x \left( \frac{1}{2} + \sigma^2 - \frac{y^4}{2(1+x^2)^2} - \frac{x^2}{1+y^2} \right) > x(1/2 + \sigma^2 - \sigma^4 - \sigma^2/4) > x(1/2 - 1/4) > 0.$$

We can therefore assume  $y \geq \sigma - x(1 + \sigma^2)$ . We have

$$(y-x)(1-2y(y+x)/\sigma^2) < (y-x)(1-(y+x)/\sigma) \leq (y-x)(1-(1-\sigma x)) < \sigma x(y-x)$$

which attains its maximum in  $x$  at  $x = y/2$ , hence

$$\xi_2 < y^5 - \frac{y^3}{1+x^2} + \frac{\sigma y^2}{4} < \frac{\sigma y^2}{4} \left( 4\sigma^2 - \frac{2}{1+\sigma^2} + 4 \right).$$

Finally we obtain the contradiction

$$\xi_2 < \frac{\sigma y^2}{4} \left( \frac{5\sigma^2 + 4\sigma^4 - 1}{1 + \sigma^2} \right) < 0$$

for all  $\sigma < 0.1$ . All cases lead to contradictions, so we conclude that  $\bar{\theta}$  is the only critical point, with positive definite Hessian

$$H(\bar{\theta}) = \begin{pmatrix} 1 & 1 \\ -1 & 1 \end{pmatrix} \succ 0,$$

hence  $\bar{\theta}$  is a strict minimum. Now notice that  $\mathcal{M}_0$  has the same dominant terms as  $\mathcal{M}$  from Theorem 1, so coercivity of  $\mathcal{M}_0$  follows from the same argument. Since  $\mathcal{M}_\sigma$  is identical to  $\mathcal{M}_0$  outside the  $\sigma$ -ball  $B_\sigma = \{(x, y) \in \mathbb{R}^2 \mid \|\theta\| < \sigma\}$ , coercivity of  $\mathcal{M}_0$  implies coercivity of  $\mathcal{M}_\sigma$  for any  $\sigma$ .

Fix any reasonable algorithm  $F$ , any bounded continuous measure  $\nu$  on  $\mathbb{R}^d$  with initial region  $U$ , and any  $\epsilon > 0$ . We abuse notation somewhat and write  $F_\sigma^k(\theta_0)$  for the  $k$ th iterate of  $F$  in  $\mathcal{M}_\sigma$  with initial parameters  $\theta_0$ . We claim that there exists  $\sigma > 0$  such that

$$P_\nu \left( \theta_0 \in U \text{ and } \lim_k F_\sigma^k(\theta_0) = \bar{\theta} \right) < \epsilon.$$



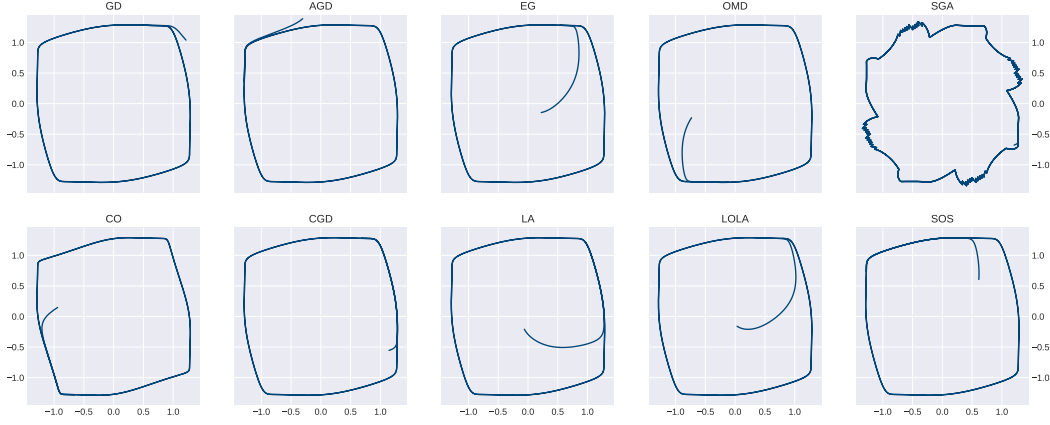

Figure 2: Algorithms in  $\mathcal{A}$  fail to converge in  $\mathcal{M}_\sigma$  with  $\sigma = \alpha = \gamma = 0.01$ . Single run with standard normal initialisation, 3000 iterations.

Since  $\bar{\theta}$  is the only critical point and  $\mathcal{M}_\sigma$  is coercive, this implies bounded but non-convergent iterates or divergent iterates with infinite losses with probability at least  $1 - \epsilon$ , proving the theorem. To begin,  $\mu(B_\sigma) \rightarrow 0$  as  $\sigma \rightarrow 0$  implies that we can pick  $\sigma' > 0$  such that  $P_\nu(\theta_0 \in B_{\sigma'}) < \epsilon/2$  by continuity of  $\nu$  with respect to Lebesgue measure.

Now let  $\bar{U}$  be the closure of  $U$  and define  $D = \bar{U} \cap \{\|\theta\| \geq \sigma'\}$ . Note that  $D$  is compact since  $\bar{U}$  is compact and closed subsets of a compact set are compact.  $F$  is reasonable,  $D$  is bounded and  $\bar{\theta} = 0$  is a strict maximum in  $\mathcal{M}_0$ , so there are hyperparameters such that the stable set

$$Z = \{\theta_0 \in D \mid \lim_k F_0^k(\theta_0) = 0\}$$

has zero measure. We claim that

$$Z_\delta := \{\theta_0 \in D \mid \inf_{k \in \mathbb{N}} \|F_0^k(\theta_0)\| < \delta\}$$

has arbitrarily small measure as  $\delta \rightarrow 0$ . Assume for contradiction that there exists  $\alpha > 0$  such that  $\mu(Z_\delta) \geq \alpha$  for all  $\delta > 0$ . Then  $Z_\delta \subset Z_{\delta'}$  and  $\mu(Z_\delta) \leq \mu(D) < \infty$  for all  $\delta < \delta'$  implies

$$\mu\left(\bigcap_{n \in \mathbb{N}} Z_{\frac{1}{n}}\right) = \lim_{n \rightarrow \infty} \mu\left(Z_{\frac{1}{n}}\right) \geq \alpha$$

by Nelson (2015, Exercise 1.19). On the other hand,

$$\bigcap_{n \in \mathbb{N}} Z_{\frac{1}{n}} = Z_0$$

yields the contradiction  $0 = \mu(Z_0) \geq \alpha$ . We conclude that  $Z_\delta$  has arbitrarily small measure, hence there exists  $\delta > 0$  such that

$$P_\nu(\theta_0 \in Z_\delta) < \epsilon/2$$

by continuity of  $\nu$ . Now let  $\sigma = \min\{\sigma', \delta\}$  and notice that

$$\theta_0 \in D \setminus Z_\delta \implies \inf_k \|F_0^k(\theta_0)\| \geq \delta \geq \sigma \implies \inf_k \|F_\sigma^k(\theta_0)\| \geq \sigma,$$

where the last implication holds since  $\mathcal{M}_\sigma$  and  $\mathcal{M}_0$  are indistinguishable in  $\{\|\theta\| \geq \sigma\}$ , so the algorithm must have identical iterates  $F_\sigma^k(\theta_0) = F_0^k(\theta_0)$  for all  $k$ . It follows by contraposition that  $\lim_k F_\sigma^k(\theta_0) = \bar{\theta}$  implies  $\inf_k \|F_\sigma^k(\theta_0)\| < \sigma$  and so  $\theta_0 \in Z_\delta$  or  $\theta_0 \notin D$ . Finally we obtain

$$\begin{aligned} P_\nu\left(\theta_0 \in U \text{ and } \lim_k F_\sigma^k(\theta_0) = \bar{\theta}\right) &= P_\nu(\theta_0 \in U \cap Z_\delta \text{ or } \theta_0 \in U \setminus D) \\ &\leq P_\nu(\theta_0 \in U \cap Z_\delta) + P_\nu(\theta_0 \in U \setminus D) \\ &\leq P_\nu(\theta_0 \in Z_\delta) + P_\nu(\theta_0 \in B_{\sigma'}) \\ &< \epsilon/2 + \epsilon/2 = \epsilon \end{aligned}$$

as required. We plot iterates for a single run of each algorithm in Figure 3 with  $\alpha = \gamma = 0.01$ .  $\square$

## F PROOF OF THEOREM 3

**Theorem 3.** *There is a weakly-coercive, nondegenerate, analytic two-player zero-sum game  $\mathcal{N}$  whose only critical point is a strict maximum. Algorithms in  $\mathcal{A}$  almost surely have bounded non-convergent iterates in  $\mathcal{N}$  for  $\alpha, \gamma$  sufficiently small.*

*Proof.* Consider the analytic zero-sum game  $\mathcal{N}$  given by

$$L^1 = xy - x^2/2 + y^2/2 + x^4/4 - y^4/4 = -L^2$$

with simultaneous gradient

$$\xi = \begin{pmatrix} y - x + x^3 \\ -x - y + y^3 \end{pmatrix}$$

and Hessian

$$H = \begin{pmatrix} -1 + 3x^2 & 1 \\ -1 & -1 + 3y^2 \end{pmatrix}.$$

We show that the only solution to  $\xi = 0$  is the origin. First we can assume  $x, y \geq 0$  since any other solution can be obtained by a quadrant variable change ( $\dagger$ ). Now assume for contradiction that  $y \neq 0$ , then

$$\xi_2 = 0 = -x - y + y^3 \leq -y + y^3 = y(y^2 - 1)$$

implies  $y \geq 1$  and hence

$$\xi_1 = 0 = y - x + x^3 \geq 1 - x + x^3 = (x + 1)(x - 1)^2 + x^2 > 0$$

which is a contradiction. It follows that  $y = 0$  and hence  $\xi_2 = 0 = x$  as required. Now the origin has invertible, negative-definite Hessian

$$H(0) = \begin{pmatrix} -1 & 1 \\ -1 & -1 \end{pmatrix} \prec 0$$

so the unique critical point is a strict maximum. The game is nondegenerate since the only critical point has invertible Hessian. The game is weakly-coercive since  $L^1(x, \bar{y}) \rightarrow \infty$  for any fixed  $\bar{y}$  by domination of the  $x^4$  term; similarly for  $L^2(\bar{x}, y)$  by domination of the  $y^4$  term.

**Bounded iterates: strategy.** We begin by showing that all algorithms have bounded iterates in  $\mathcal{N}$  for  $\alpha, \gamma$  sufficiently small. For each algorithm  $F$ , our strategy is to show that there exists  $r > 0$  such that for any  $s > 0$  we have  $\|F(\theta)\| < \|\theta\|$  for all  $r < \|\theta\| < s$  and  $\alpha, \gamma$  sufficiently small. This will be enough to prove bounded iteration upon bounded initialisation. Denote by  $B_r$  the ball of radius  $r$  centered at the origin.

**GD.** We have

$$\begin{aligned} \theta^T \xi &= x(y - x + x^3) + y(-x - y + y^3) \\ &= x^4 - x^2 + y^4 - y^2 \\ &= (x^2 - 1)^2 + (y^2 - 1)^2 + x^2 + y^2 - 2 > 1 \end{aligned}$$

for all  $\|\theta\|^2 = x^2 + y^2 > 3$ . For any  $s > 0$  we obtain

$$\|F(\theta)\|^2 = \|\theta - \alpha\xi\|^2 = \|\theta\|^2 - 2\alpha\theta^T\xi + \alpha^2\|\xi\|^2 < \|\theta\|^2 - \alpha(2 - \alpha\|\xi\|^2) < \|\theta\|^2$$

for all  $\sqrt{3} < \|\theta\| < s$  and  $\alpha$  sufficiently small, namely  $0 < \alpha < 2/\sup_{\theta \in B_s} \|\xi\|^2$ .

**EG.** For any  $s > 0$  and  $\sqrt{4} < \|\theta\| < s$  we have

$$\|\theta - \alpha\xi(\theta)\|^2 > 4 - 2\alpha\theta^T\xi > 3$$

for  $\alpha < 1/\sup_{\theta \in B_s} 2\theta^T\xi$ . Now using  $\theta^T\xi > 1$  for all  $\|\theta\|^2 > 3$  by the argument for GD above,

$$\begin{aligned} \|F(\theta)\|^2 &= \|\theta\|^2 - 2\alpha\theta^T\xi(\theta - \alpha\xi(\theta)) + \alpha^2\|\xi(\theta - \alpha\xi(\theta))\|^2 \\ &= \|\theta\|^2 - 2\alpha(\theta - \alpha\xi(\theta))^T\xi(\theta - \alpha\xi(\theta)) + O(\alpha^2) \\ &< \|\theta\|^2 - \alpha(2 - O(\alpha)) < \|\theta\|^2 \end{aligned}$$

for  $\alpha$  sufficiently small.

**AGD.** For any  $s > 0$ , notice by continuity of  $\xi$  that there exists  $\delta > 0$  such that

$$\theta^T(\xi_1, \xi_2(\theta_1 - \alpha\xi_1, \theta_2)) > \theta^T\xi - 1/2$$

for all  $\alpha < \delta$  and  $\theta \in B_s$ , since  $B_s$  is bounded and  $\theta_1 - \alpha\xi_1 \rightarrow \theta_1$  as  $\alpha \rightarrow 0$ . It follows that

$$\begin{aligned} \|F(\theta)\|^2 &= \|\theta\|^2 - 2\alpha\theta^T(\xi_1, \xi_2(\theta_1 - \alpha\xi_1, \theta_2)) + O(\alpha^2) \\ &< \|\theta\|^2 - 2\alpha(\theta^T\xi - 1/2) + O(\alpha^2) \\ &< \|\theta\|^2 - 2\alpha(1 - 1/2) + O(\alpha^2) \\ &< \|\theta\|^2 - \alpha(1 - O(\alpha)) < \|\theta\|^2 \end{aligned}$$

for all  $\sqrt{3} < \|\theta\| < s$  and  $\alpha < \delta$  sufficiently small.

**OMD.** For any  $s > 0$ , notice by continuity of  $\xi$  that there exists  $\delta > 0$  such that

$$|\theta^T(\xi(\theta) - \xi((\text{id} - \alpha\xi)^{-1}(\theta)))| < 1/2$$

for all  $\alpha < \delta$  and  $\theta \in B_s$ , since  $B_s$  is bounded and  $(\text{id} - \alpha\xi)^{-1}(\theta) \rightarrow \theta$  as  $\alpha \rightarrow 0$ . It follows that

$$\begin{aligned} \|F(\theta)\|^2 &= \|\theta\|^2 - 2\alpha\theta^T\xi - 2\alpha\theta^T(\xi(\theta) - \xi((\text{id} - \alpha\xi)^{-1}(\theta))) + O(\alpha^2) \\ &< \|\theta\|^2 - 2\alpha + \alpha + O(\alpha^2) \\ &= \|\theta\|^2 - \alpha(1 - O(\alpha)) < \|\theta\|^2 \end{aligned}$$

for all  $\sqrt{3} < \|\theta\| < s$  and  $\alpha < \delta$  sufficiently small.

**CO, CGD, LA, LOLA, SOS.** Writing  $\nu$  for  $\gamma$  if  $F = F_{CO}$  and  $\nu$  for  $\alpha$  otherwise, for each algorithm we have

$$F(\theta) = \theta - \alpha\xi + \alpha\nu K$$

for some continuous function  $K : \mathbb{R}^d \rightarrow \mathbb{R}$ . For instance,  $K = -H^T\xi$  for CO (see Appendix A). We obtain

$$\begin{aligned} \|F(\theta)\|^2 &= \|\theta - \alpha\xi + \alpha\nu K\|^2 \\ &= \|\theta\|^2 - 2\alpha\theta^T\xi + 2\alpha\nu\theta^TK - 2\alpha^2\nu\xi^TK + \alpha^2\|\xi\|^2 + \alpha^2\nu^2\|K\|^2 \\ &= \|\theta\|^2 - \alpha \left( 2\theta^T\xi - 2\nu\theta^TK + 2\alpha\nu\xi^TK - \alpha\|\xi\|^2 - \alpha\nu^2\|K\|^2 \right). \end{aligned}$$

Notice that every term in the brackets contains an  $\alpha$  or  $\nu$  except for the first. We have already shown that  $\theta^T\xi > 1$  for all  $\|\theta\|^2 > 3$  for GD above, hence for any  $s > 0$  we have

$$\begin{aligned} \|F(\theta)\|^2 &< \|\theta\|^2 - \alpha \left( 2 - 2\nu \sup_{\theta \in B_s} \theta^TK + 2\alpha\nu \inf_{\theta \in B_s} \xi^TK - \alpha \sup_{\theta \in B_s} \|\xi\|^2 - \alpha \sup_{\theta \in B_s} \nu^2\|K\|^2 \right) \\ &= \|\theta\|^2 - \alpha(2 - O(\alpha, \nu)) < \|\theta\|^2 \end{aligned}$$

for all  $\sqrt{3} < \|\theta\|^2 < s$  and  $\alpha, \nu$  sufficiently small.

**SGA.** The situation differs from the above since parameter  $\lambda$  follows an alignment criterion, namely  $\lambda = \text{sign}(\langle \xi, H^T\xi \rangle \langle A^T\xi, H^T\xi \rangle)$ , which cannot be made small. First note that

$$\theta^TG_{SGA} = \theta^t\xi + \lambda\theta^T(A^T\xi) = x^4 + y^4 - x^2 - y^2 + \lambda(x^2 + y^2 + x^3y - xy^3).$$

If  $\lambda = -1$ ,

$$\theta^TG_{SGA} = x^4 + y^4 - 2x^2 - 2y^2 - x^3y + xy^3$$

and splitting  $x^4 + y^4$  in two yields

$$\frac{x^4 + y^4}{2} - 2x^2 - 2y^2 = \frac{1}{4}[(x^2 - y^2)^2 + (x^2 + y^2)(x^2 + y^2 - 8)] > 1$$

for  $\|\theta\|^2 = x^2 + y^2 > 9$ , while

$$\frac{x^4 + y^4}{2} - x^3y + xy^3 = \frac{1}{2}[(-x^2 + xy + y^2)^2 + x^2y^2] > 0$$

for  $\|\theta\| > 0$ . Summing the two yields  $\theta^T G_{SGA} > 1$  for  $\|\theta\|^2 > 9$  and  $\lambda = -1$ . If  $\lambda = 1$ ,

$$\begin{aligned}\theta^T G_{SGA} &= x^4 + y^4 + x^3y - xy^3 \\ &= x^4 + y^4 - 2x^2 - 2y^2 + x^3y - xy^3 + 2(x^2 + y^2) \\ &\geq x^4 + y^4 - 2x^2 - 2y^2 + x^3y - xy^3 > 1\end{aligned}$$

for  $\|\theta\|^2 > 9$  by swapping  $x$  and  $y$  in the  $\lambda = -1$  case above. We conclude  $\theta^T G_{SGA} > 1$  for  $\|\theta\|^2 > 9$  regardless of  $\lambda$ . For any  $s > 0$  we obtain

$$\|F(\theta)\|^2 = \|\theta\|^2 - 2\alpha\theta^T G_{SGA} + \alpha^2 \|G_{SGA}\|^2 < \|\theta\|^2 - \alpha \left(2 - \alpha \|G_{SGA}\|^2\right) < \|\theta\|^2$$

for all  $3 < \|\theta\| < s$  and  $\alpha < 2/\sup_{\theta \in B_s} G_{SGA}$ .

**Bounded iterates: conclusion.** Now assume as usual that  $\theta_0$  is initialised in any bounded region  $U$ . For each algorithm we have found  $r$  such that for any  $s > 0$  we have  $\|F(\theta)\| < \|\theta\|$  for all  $r < \|\theta\| < s$  and  $\alpha, \gamma$  sufficiently small. Now pick  $r' \geq r$  such that  $U \subset B_{r'}$ . Define the bounded region

$$V = \{\theta - tG(\theta) \mid t \in [0, 1], \theta \in B_{r'}\}.$$

and pick  $s \geq r'$  such that  $V \subset B_s$ . By the above we have  $\|F(\theta)\| < \|\theta\|$  for all  $r < \|\theta\| < s$  and  $\alpha, \gamma$  sufficiently small. In particular, fix any  $\alpha, \gamma < 1$  satisfying this condition. We claim that  $F(\theta) \in B_s$  for all  $\theta \in B_s$ . Indeed, either  $\theta \in B_r$  implies  $F(\theta) = \theta - \alpha G(\theta) \in V \subset B_s$  or  $\theta \notin B_r$  implies  $\|F(\theta)\| < \|\theta\| < s$  and so  $F(\theta) \in B_s$ . We conclude that  $\theta_0 \in U \subset B_s$  implies bounded iterates  $\theta_k = F^k(\theta) \in B_s$  for all  $k$ .

**Non-convergence: strategy.** We show that all methods in  $\mathcal{A}$  have the origin as unique fixed points for  $\alpha, \gamma$  sufficiently small. Fixed points of each gradient-based method are given by  $G = 0$ , where  $G$  is given in Appendix A, and we moreover show that the Jacobian  $\nabla G$  at the origin is negative-definite. Non-convergence will follow from this for  $\alpha$  sufficiently small.

**GD.** Fixed points of simultaneous GD correspond by definition to critical points:

$$G_{GD} = \xi = 0 \iff \theta = 0.$$

The Jacobian of  $G$  at 0 is

$$\nabla \xi = H = \begin{pmatrix} -1 & 1 \\ -1 & -1 \end{pmatrix} \prec 0.$$

**AGD.** We have

$$G_{AGD} = 0 \iff \begin{cases} \xi_1 = 0 \\ \xi_2(\theta_1 - \alpha\xi_1, \theta_2) = 0 \end{cases} \iff \begin{cases} \xi_1 = 0 \\ \xi_2 = 0 \end{cases} \iff \xi = 0 \iff \theta = 0.$$

Now

$$\begin{aligned}\xi_2(x - \alpha\xi_1(x, y), y) &= -(x - \alpha(y - x + x^3)) - y + y^3 \\ &= x(-1 - \alpha) + y(-1 + \alpha) + \alpha x^3 + y^3\end{aligned}$$

so the Jacobian at the origin is

$$J_{AGD} = \begin{pmatrix} -1 & 1 \\ -1 - \alpha & -1 + \alpha \end{pmatrix}$$

with symmetric part

$$S_{AGD} = \begin{pmatrix} -1 & -\alpha/2 \\ -\alpha/2 & -1 + \alpha \end{pmatrix}$$

which has negative trace for all  $\alpha < 2$  and positive determinant

$$-\alpha^2/2 - \alpha + 1 = -(\alpha + 1)^2/2 + 3/2 > -9/8 + 3/2 > 0$$

for all  $\alpha < 1/2$ , which together imply negative eigenvalues and hence  $S_{AGD} \prec 0$ . Recall that a matrix is negative-definite iff its symmetric part is, hence  $J_{AGD} \prec 0$  for all  $\alpha < 1/2$ .

**EG.** We have

$$G_{EG} = \xi \circ (\text{id} - \alpha\xi) = 0 \iff \text{id} - \alpha\xi = 0 \iff \begin{cases} x - \alpha(y - x + x^3) = 0 \\ y - \alpha(-x - y + y^3) = 0. \end{cases}$$

We have shown that any bounded initialisation results in bounded iterates for EG for  $\alpha$  sufficiently small. Let  $U$  be this bounded region and assume for contradiction that  $\text{id} - \alpha\xi = 0$  with  $x, y \neq 0$  (noting that  $x = 0$  implies  $y = 0$  by the first equation and vice-versa). We can assume  $x, y > 0$  since any other solution can be obtained by a quadrant change of variable ( $\dagger$ ). We first prove that  $x, y < 1$  for  $0 < \alpha < 1/\sup_{\theta \in U}\{y - x + x^3\}$ . Indeed we have

$$0 = \xi_1 > x - \alpha \sup_{\theta \in U} > x - 1$$

hence  $x < 1$ . A similar derivation holds for  $y$ , hence  $0 < x, y < 1$ . But now  $x \geq y$  implies

$$0 = \xi_1 \geq x - \alpha(y - y + x^3) = x(1 - \alpha x^2) \geq x(1 - \alpha) > 0$$

for  $\alpha < 1$  while  $x < y$  implies

$$0 = \xi_2 \geq y - \alpha(-x - x + y^3) = y(1 - \alpha y^2) \geq y(1 - \alpha) > 0$$

and the contradiction is complete, hence  $\theta = 0$  is the only fixed point of EG. Now

$$J_{EG} = H(I - \alpha H) = \begin{pmatrix} -1 & 1 \\ -1 & -1 \end{pmatrix} \begin{pmatrix} 1 + \alpha & -\alpha \\ \alpha & 1 + \alpha \end{pmatrix} = \begin{pmatrix} -1 & 1 + 2\alpha \\ -1 - 2\alpha & -1 \end{pmatrix}$$

with  $S_{EG} = -I \prec 0$ , hence  $J_{EG} \prec 0$  for all  $\alpha$ .

**OMD.** By [Daskalakis & Panageas \(2018, Remark 1.5\)](#), fixed points of OMD must satisfy  $\xi = 0$  by viewing OMD as mapping pairs  $(\theta_k, \theta_{k-1})$  to pairs  $(\theta_{k+1}, \theta_k)$ , hence  $\theta = 0$ . Now

$$J_{OMD} = 2H - H(I - \alpha H)^{-1} = 2 \begin{pmatrix} -1 & 1 \\ -1 & -1 \end{pmatrix} - \frac{1}{1 + 2\alpha + 2\alpha^2} \begin{pmatrix} -1 - 2\alpha & 1 \\ -1 & -1 - 2\alpha \end{pmatrix}.$$

Now notice that

$$\frac{1 + 2\alpha}{1 + 2\alpha + 2\alpha^2} \leq 1$$

and so

$$S_{OMD} = \begin{pmatrix} -2 + \frac{1+2\alpha}{1+2\alpha+2\alpha^2} & 0 \\ 0 & -2 + \frac{1+2\alpha}{1+2\alpha+2\alpha^2} \end{pmatrix} \prec 0$$

for all  $\alpha$ .

**CO.** We have

$$G_{CO} = (I + \gamma H^T)\xi = 0 \iff \xi = 0 \iff \theta = 0$$

for all  $\gamma$  since the matrix

$$(I + \gamma H^T) = \begin{pmatrix} 1 - \gamma & -\gamma \\ \gamma & 1 - \gamma \end{pmatrix}$$

is always invertible with determinant  $(1 - \gamma)^2 + \gamma^2 > 0$ . Now

$$J_{CO} = (I + \gamma H^T)H = \begin{pmatrix} 1 - \gamma & -\gamma \\ \gamma & 1 - \gamma \end{pmatrix} \begin{pmatrix} -1 & 1 \\ -1 & -1 \end{pmatrix} = \begin{pmatrix} -1 + 2\gamma & 1 \\ -1 & -1 + 2\gamma \end{pmatrix} \prec 0$$

for all  $\gamma < 1/2$ .

**SGA.** We have

$$G_{\text{SGA}} = (I + \lambda A^T)\xi = 0 \iff \xi = 0 \iff \theta = 0$$

since antisymmetric  $A$  with eigenvalues  $ia$ ,  $a \in \mathbb{R}$  implies that  $I + \lambda A^T$  is always invertible with eigenvalues  $1 + i\lambda a \neq 0$ . Now recall that  $\lambda$  is given by

$$\lambda = \text{sign}(\langle \xi, H^T \xi \rangle \langle A^T, H^T \xi \rangle) = \text{sign}(\xi^T H^T \xi \cdot \xi^T A H^T \xi).$$

We have

$$H^T = \begin{pmatrix} -1 + 3x^2 & -1 \\ 1 & -1 + 3y^2 \end{pmatrix} \prec 0$$

and

$$A H^T = \begin{pmatrix} 1 & -1 + 3y^2 \\ 1 - 3x^2 & 1 \end{pmatrix} \succ 0$$

for all  $\|\theta\|$  sufficiently small, hence  $\xi^T H^T \xi \leq 0$  and  $\xi^T A H^T \xi \geq 0$  and thus

$$\lambda = \text{sign}(\langle \xi, H^T \xi \rangle \langle A^T, H^T \xi \rangle) = \text{sign}(\xi^T H^T \xi \cdot \xi^T A H^T \xi) \leq 0$$

around the origin. Now

$$J_{\text{SGA}} = (I + \lambda A^T)H = \begin{pmatrix} 1 & -\lambda \\ \lambda & 1 \end{pmatrix} \begin{pmatrix} -1 & 1 \\ -1 & -1 \end{pmatrix} = \begin{pmatrix} -1 + \lambda & 1 + \lambda \\ -1 - \lambda & -1 + \lambda \end{pmatrix} \prec 0$$

for all  $\lambda < 1$ , which holds in particular for  $\lambda \leq 0$ .

**CGD.** Note that

$$H_o = \begin{pmatrix} 0 & 1 \\ -1 & 0 \end{pmatrix} = A$$

is antisymmetric, hence  $I + \alpha H_o$  is always invertible as for SGA and

$$G_{\text{CGD}} = (I + \alpha H_o)^{-1} \xi = 0 \iff \xi = 0 \iff \theta = 0.$$

Now

$$J_{\text{CGD}} = (I + \alpha H_o)^{-1} H = \frac{1}{1 + \alpha^2} \begin{pmatrix} 1 & -\alpha \\ \alpha & 1 \end{pmatrix} \begin{pmatrix} -1 & 1 \\ -1 & -1 \end{pmatrix} = \frac{1}{1 + \alpha^2} \begin{pmatrix} -1 + \alpha & 1 + \alpha \\ -1 - \alpha & -1 + \alpha \end{pmatrix} \prec 0$$

for all  $\alpha < 1$ .

**LA.** As above,

$$G_{\text{LA}} = (I - \alpha H_o)\xi = 0 \iff \xi = 0 \iff \theta = 0$$

since  $(I - \alpha H_o)$  is always invertible. Now

$$J_{\text{LA}} = (I - \alpha H_o)H = (I - \alpha A)H = \begin{pmatrix} -1 + \alpha & 1 + \alpha \\ -1 - \alpha & -1 + \alpha \end{pmatrix} \prec 0$$

for all  $\alpha < 1$ .

**LOLA.** Notice that

$$\begin{aligned} \text{diag}(H_o^T \nabla L) &= \text{diag}\left(\begin{pmatrix} 0 & -1 \\ 1 & 0 \end{pmatrix} \begin{pmatrix} y - x + x^3 & -y + x - x^3 \\ x + y - y^3 & -x - y + y^3 \end{pmatrix}\right) \\ &= \begin{pmatrix} -x - y + y^3 \\ -y + x - x^3 \end{pmatrix} = H_o \xi \end{aligned}$$

and so

$$G_{\text{LOLA}} = (I - \alpha H_o)\xi - \alpha \text{diag}(H_o^T \nabla L) = (I - 2\alpha H_o)\xi \iff \xi = 0 \iff \theta = 0$$

as for LA. Similarly, substituting  $2\alpha$  for  $\alpha$  in the derivation for LA yields

$$J_{\text{LOLA}} = (I - 2\alpha H_o)H \prec 0$$

for all  $\alpha < 1/2$ .

**SOS.** As for LOLA we have

$$G_{\text{SOS}} = (I - \alpha H_o)\xi - p\alpha \text{diag}(H_o^T \nabla L) = (I - \alpha(1+p)H_o)\xi \iff \xi = 0 \iff \theta = 0$$

for any  $\alpha, p$ . Now  $p(\bar{\theta}) = 0$  for fixed points  $\bar{\theta}$  by [Letcher et al. \(2019b\)](#), Lemma D.7), hence

$$J_{\text{SOS}} = J_{\text{LA}} = \begin{pmatrix} -1 + \alpha & 1 + \alpha \\ -1 - \alpha & -1 + \alpha \end{pmatrix} \prec 0$$

for all  $\alpha < 1$ .

**Non-convergence: conclusion.** We conclude that all algorithms in  $\mathcal{A}$  have the origin as unique fixed points, with negative-definite Jacobian, for  $\alpha, \gamma$  sufficiently small. If a method converges, it must therefore converge to the origin. We show that this occurs with zero probability. One may invoke the Stable Manifold Theorem from dynamical systems, but there is a more direct proof.

Take any algorithm  $F$  in  $\mathcal{A}$  and let  $U$  be the initialisation region. We prove that the stable set

$$Z = \{\theta_0 \in U \mid \lim_k F^k(\theta_0) = 0\}$$

has Lebesgue measure zero for  $\alpha$  sufficiently small. First assume for contradiction that  $\theta_k \rightarrow 0$  with  $\theta_k \neq 0$  for all  $k$ . Then

$$G(\theta_k) = G(0) + \nabla G(0)\theta_k + O(\|\theta_k\|^2) = \nabla G(\bar{\theta})(\theta_k) + O(\|\theta_k\|^2)$$

since  $G(0) = 0$ , and we obtain

$$\begin{aligned} \|\theta_{k+1}\|^2 &= \|\theta_k - \alpha G(\theta_k)\|^2 \\ &= \|\theta_k\|^2 - 2\alpha \theta_k^T G(\theta_k) + \alpha^2 \|G(\theta_k)\|^2 \\ &\geq \|\theta_k\|^2 - 2\alpha \theta_k^T \nabla G(0)\theta_k + O(\|\theta_k\|^3) > \|\theta_k\|^2 \end{aligned}$$

for all  $k$  sufficiently large, since  $\nabla G(0) \prec 0$ . This is a contradiction to  $\theta_k \rightarrow 0$ , so  $\theta_k \rightarrow 0$  implies  $\theta_k = 0$  for some  $k$  and so, writing  $F_U : U \rightarrow \mathbb{R}^d$  for the restriction of  $F$  to  $U$ ,

$$Z \subset \cup_{k=0}^{\infty} F_U^{-k}(\{0\}).$$

We claim that  $F_U$  is a  $C^1$  local diffeomorphism, and a diffeomorphism onto its image. Now  $G_U$  is  $C^1$  with bounded domain, hence  $L$ -Lipschitz for some finite  $L$ . By Lemma 0, the eigenvalues of  $\nabla G$  in  $U$  satisfy  $|\lambda| \leq \|\nabla G\| \leq L$ , hence  $\nabla F_U = I - \alpha \nabla G_U$  has eigenvalues  $1 - \alpha\lambda \geq 1 - \alpha L > 0$ . It follows that  $\nabla F_U$  is invertible everywhere, so  $F_U$  is a local diffeomorphism by the Inverse Function Theorem ([Spivak, 1971](#), Th. 2.11). To prove that  $F_U : U \rightarrow F(U)$  is a diffeomorphism, it is sufficient to show injectivity of  $F_U$ . Assume for contradiction that  $F_U(\theta) = F_U(\theta')$  with  $\theta \neq \theta'$ . Then by definition,

$$\theta - \theta' = \alpha(G_U(\theta') - G_U(\theta))$$

and so

$$\|\theta - \theta'\| = \alpha \|G_U(\theta') - G_U(\theta)\| \leq \alpha L \|\theta - \theta'\| < \|\theta - \theta'\|,$$

a contradiction. We conclude that  $F_U$  is a diffeomorphism onto its image with continuously differentiable inverse  $F_U^{-1}$ , hence  $F_U^{-1}$  is locally Lipschitz and preserves measure zero sets. It follows by induction that  $\mu(F_U^{-k}(\{0\})) = 0$  for all  $k$ , and so

$$\mu(Z) \leq \mu(\cup_{k=0}^{\infty} F_U^{-k}(\{0\})) = 0$$

since countable unions of measure zero sets have zero measure. Since  $\theta_0$  follows a continuous distribution  $\nu$ , we conclude

$$P_\nu \left( \lim_k F^k(\theta_0) = 0 \right) = 0$$

as required. Since all algorithms were also shown to produce bounded iterates, they almost surely have bounded non-convergent iterates for  $\alpha, \gamma$  sufficiently small. The proof is complete; iterates are plotted for a single run of each algorithm in Figure 3 with  $\alpha = \gamma = 0.01$ .  $\square$

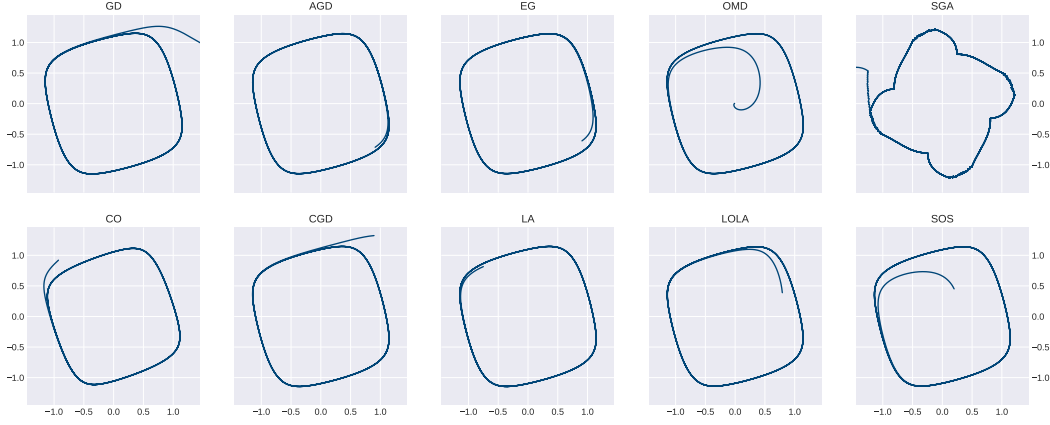

Figure 3: Algorithms in  $\mathcal{A}$  fail to converge in  $\mathcal{N}$  with  $\alpha = \gamma = 0.01$ . Single run with standard normal initialisation, 3000 iterations.

## G PROOF OF COROLLARY 1

**Corollary 1.** *There are no measures of progress for reasonable algorithms which produce bounded iterates in  $\mathcal{M}$  or  $\mathcal{N}$ .*

*Proof.* Assume for contradiction that a measure of progress  $M$  exists for some reasonable algorithm  $F$  and consider the iterates  $\theta_k$  produced in the game  $\mathcal{M}$  or  $\mathcal{N}$ . We prove that the set of accumulation points of  $\theta_k$  is a subset of critical points, following [Lange \(2013, Prop. 12.4.2\)](#). Consider any accumulation point  $\bar{\theta} = \lim_{m \rightarrow \infty} \theta_{k_m}$ . The sequence  $M(\theta_k)$  is monotonically decreasing and bounded below, hence convergent. In particular,

$$\lim_m M(F(\theta_{k_m})) = \lim_m M(\theta_{k_m+1}) = \lim_m M(\theta_{k_m}).$$

By continuity of  $M$  and  $F$ , we obtain

$$M(F(\bar{\theta})) = M(\lim_m F(\theta_{k_m})) = \lim_m M(F(\theta_{k_m})) = \lim_m M(\theta_{k_m}) = M(\bar{\theta})$$

and hence  $F(\bar{\theta}) = \bar{\theta}$ . Since  $F$  is reasonable,  $\bar{\theta}$  must be a critical point. Now the only critical point of  $\mathcal{M}$  or  $\mathcal{N}$  is the strict maximum  $\bar{\theta} = 0$ , so any accumulation point of  $\theta_k$  must be  $\bar{\theta}$ . The sequence  $\theta_k$  is assumed to be bounded, so it must have at least one accumulation point by Bolzano-Weierstrass. A sequence with exactly one accumulation point is convergent, hence  $\theta_k \rightarrow \bar{\theta}$ . This is in contradiction with the algorithm being reasonable.  $\square$
